# Supplementary material
Source: Springer Nature journal article supplement (https://www.springermedizin.de/resource/supplementary/12885_2011_2851_MOESM4_ESM.pdf/9462116)

Odds Ratio and 95% CL

P OR LCL UCL

Region (p= 0.004 )

- ( ATL vs WMW )

0.003 2.51 1.37 4.59

- ( SOU vs WMW )

0.014 2.16 1.17 4.00

Age (p= 0.009 )

- ( 55-64 vs .<55 )

0.170 0.63 0.33 1.22

- ( 65-74 vs .<55 )

0.081 0.40 0.14 1.12

- ( 75+ vs .<55 )

0.001 0.13 0.04 0.46

Patient Gender ( male vs female )

0.026 0.55 0.32 0.93

Insurance (p= 0.049 )

- ( Public vs Private )

0.164 0.51 0.19 1.32

- ( Supplemental vs Private )

0.283 1.83 0.60 5.53

- ( VA vs Private )

0.286 0.62 0.26 1.49

Comorbidity (p= 0.282 )

- ( Mild vs None )

0.484 1.24 0.68 2.24

- ( Moderate vs None )

0.089 1.95 0.90 4.23

- ( Severe vs None )

0.155 1.86 0.79 4.37

Race ( white vs non-white )

0.681 1.12 0.65 1.91

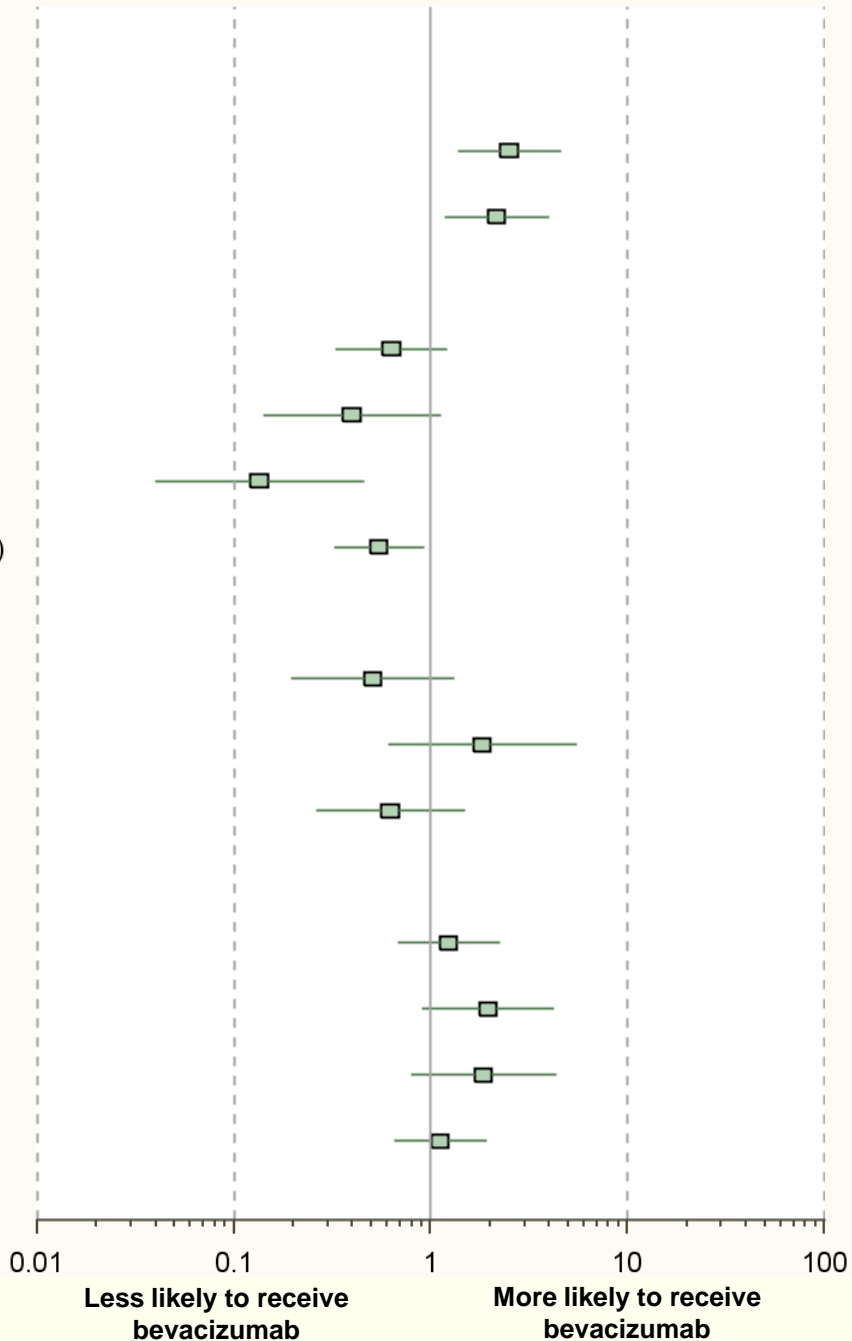

Supplement: MOESM4 [file 9462116]
